# Supplementary material
Source: PubMed Central journal article supplement (PMC2910161)

**Supplementary Figure S1 | (A)** Pharmacokinetics study for crimson carrier in *Hairless*<sup>SKH1/SKH1</sup> mice. Mice were injected with 100 µl of crimson carrier intravenously through the tail vein. The first image was captured prior to injection of crimson carrier; time thereafter in reference to crimson carrier injection. The images are displayed on a minimum – maximum scale of  $1 \times 10^9$  to  $6 \times 10^9$  photons/s/cm<sup>2</sup>/steradian. **(B)** Serial imaging was performed on all 3 mice for 10 days. Clearance Half-life of crimson carrier was approximately 144 hours. Error bars, s.d.

**Supplementary Figure S2 |** Development of black patches on C57BL/6 mice. **(A)** Photo of mouse at baseline. **(B)** Photo of same mouse seven days later. Arrows point out the development of hyper-pigmentation.

# Supplementary Figure-S1

A

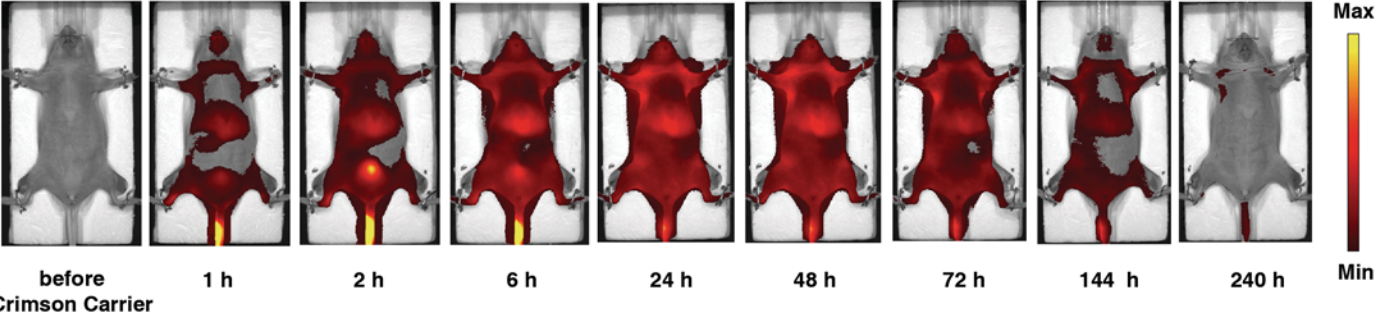

B

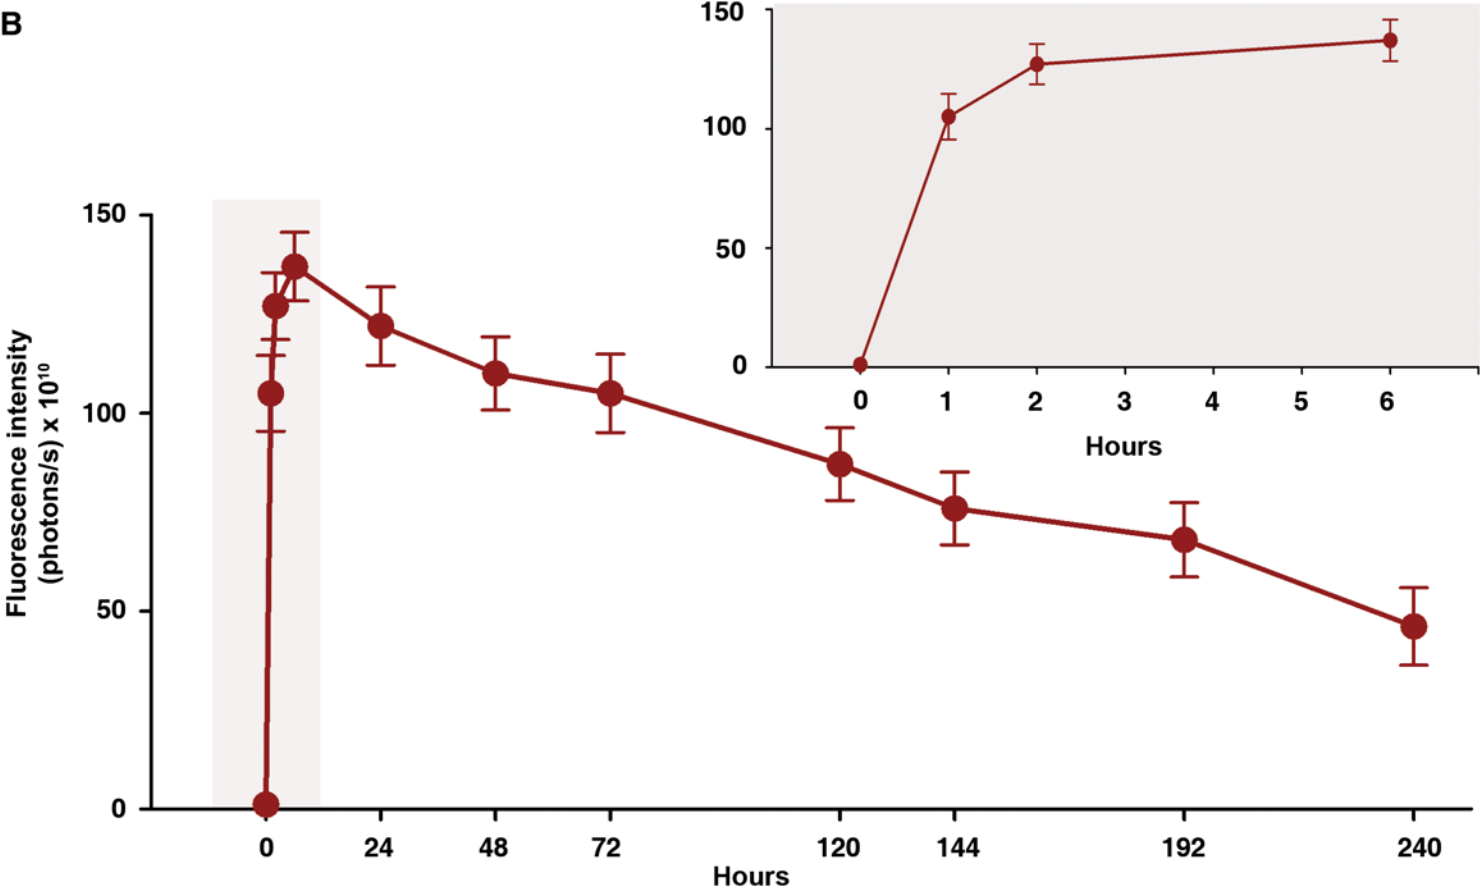

Supplementary Figure-S2

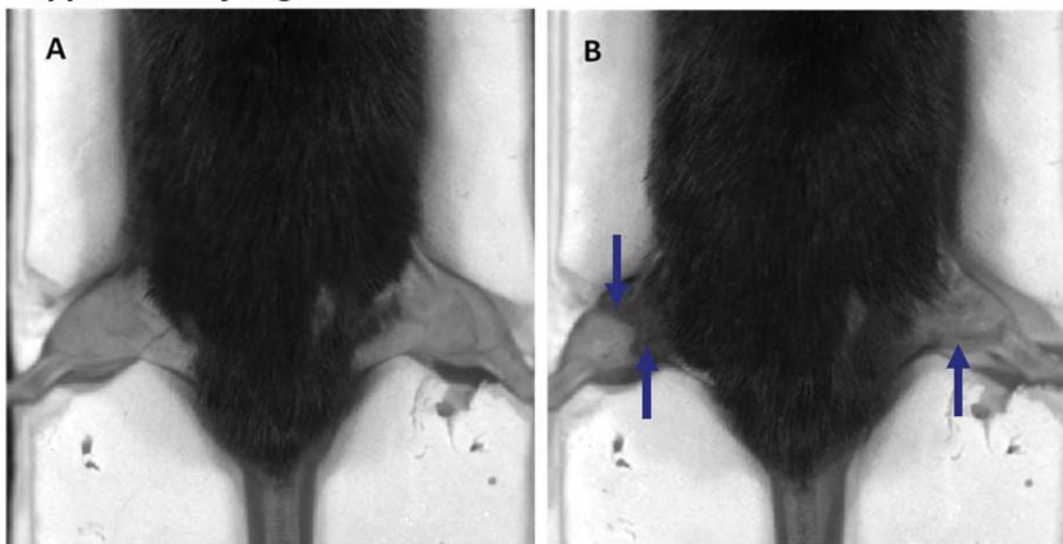

Supplement: NIHMS207740-supplement-01.pdf [file NIHMS207740-supplement-01.pdf]
